# Supplementary material for: Development of high-precision distributed wireless microseismic acquisition stations
Source: Copernicus journal article supplement (doi:10.5194/gi-2018-17), 2018-06-14
Supplement: Supplementary file [file gi-2018-17-AC1-supplement.pdf]

## **Point-by-point replies to the comments of Referee**

Your comments impress us a lot. We really appreciate your time and energy for reviewing our manuscript. It is hard for us to express our grateful feeling. In fact, we have learned many things during this revision process, and such experience would be very helpful for our future study.

We herewith provide our response to your comments as below:

1. the test of harmonic distortion in Section 5.2, the description of theoretical knowledge is rather complicated. When the system is tested, it is necessary to pay attention to the display of test results and the theoretical knowledge should not be described too much.

### **Our response:**

The explanation here is for the non-professionals to be more clear when reading, I will cut it down appropriately.

2. Some charts in this article have no information. For example, the figure without information volume in figure 10 is not necessary to be placed in the text. It is recommended to streamline and ensure the refinement of the article.

### **Our response:**

Figure 10 is the most recent revision I will notice that it has been removed.

3. The reference should be adjusted appropriately to ensure the same format.

### **Our response:**

Thank you for your suggestion. After checking and checking, the format is different and has been corrected.
